# Supplementary material for: SNPs Associated With Testosterone Levels Influence Human Facial Morphology
Source: Front Genet. 2018 Oct 23;9:497. doi: 10.3389/fgene.2018.00497 (PMC6206510; doi:10.3389/fgene.2018.00497)
Supplement: TABLE S1 — List of 44 candidate SNPs selected from the literature. [file Table_1.xlsx]

## Sheet: S1 candidate SNPs
Reference	SNP	Position	Gene/region	MAF	Included in segmentation analysis	Included in index analysis
Ohlsson et al, 2011	rs12150660	17:7618597	SHBG	0.09	yes	yes
	rs6258	17:7631360	SHBG	0.002	no	no
	rs5934505	X:8945785	FAM9B	0.26	no	yes
Ruth et al, 2016	rs1641549	17:7671457	SHBG	0.43	yes	yes
	rs148982377	2:111191750	DHEAS	0.02	no	yes
Jin et al, 2012	rs727428	17:7634474	SHBG	0.48	yes	yes
	rs10822184	10:63577393	JMJD1C	0.48	yes	yes
	rs10822186	10:63590623	JMJD1C	0.47	yes	yes
	rs72829446	17:7648805	SHBG	0.03	yes	yes
	rs6259	17:7633209	SHBG	0.07	no	yes
	rs1799941	17:7630105	SHBG	0.1	yes	yes
Chen et al, 2013	rs2075230	17:7583790	SHBG	0.24	yes	yes
Prescott et al, 2012	rs909814	1:22247449	1p36	0.38	yes	yes
	rs11132733	4:189720016	4q35	0.36	no	yes
	rs9905820	17:12734054	17p12	0.49	yes	yes
	rs10495024	1:216459606	1q41	0.33	no	yes
	rs12059860	1:46819251	1p33	0.05	yes	yes
	rs4815670	20:4236217	20p13	0.46	yes	yes
	rs727428	17:7634474	SHBG	0.48	yes	yes
	rs10514317	5:89813933	5q14	0.06	no	yes
	rs6721345	2:241073314	2q37	0.05	yes	no
	rs424950	1:163987266	1q23	0.38	yes	yes
	rs8077059	17:57746191	17q23	0.3	yes	yes
	rs3849491	3:76435032	3p12	0.44	yes	yes
	rs10795130	10:4108929	10p15	0.21	yes	yes
	rs12596210	16:53994059	16q12	0.13	yes	yes
Zhai et al, 2011	rs11761528	7:99521178	ZKSCAN5	0.1	yes	yes
	rs2637125	19:47898636	SULT2A1	0.06	yes	yes
	rs7181230	15:40068540	BMF	0.27	no	yes
	rs2497306	10:92725454	HHEX	0.29	yes	yes
	rs2185570	10:94991513	CYP2C9	0.05	yes	yes
	rs740160	7:99360257	ARPC1A	0.08	no	yes
	rs17277546	7:99891948	TRIM4	0.02	no	yes
	rs6738028	2:111191750	BCL2L11	0.42	yes	yes
Coviello et al, 2012	rs12150660	17:7618597	SHBG	0.09	yes	yes
	rs7910927	10:63379150	JMJD1C	0.39	yes	yes
	rs780093	2:27519736	GCKR	0.29	yes	yes
	rs2411984	17:49368389	ZNF652	0.33	yes	yes
	rs1573036	X:110576840	TDGF3	0.31	yes	yes
	rs8023580	15:96165062	NR2F2	0.31	yes	yes
	rs17496332	1:107003753	PRMT6	0.23	no	yes
	rs440837	8:80549739	BTB10	0.41	yes	yes
	rs4149056	12:21178615	SLCO1B1	0.09	no	yes
	rs3779195	7:98364050	BAIAP2L1	0.19	no	yes
	rs10454142	2:48419260	LHCGR	0.22	no	yes
	rs293428	4:68726064	UGT2B15	0.45	no	yes

## Sheet: S2 results met-analysis
CHR	SNPs	Meta-analysis	Module 1	Module 2	Module 3	Module 4	Module 5	Module 6	Module 7	Module 8	Module 9	Module 10	Module 11	Module 12	Module 13	Module 14	Module 15	Module 16	Module 17	Module 18	Module 19	Module 20	Module 21	Module 22	Module 23	Module 24	Module 25	Module 26	Module 27	Module 28	Module 29	Module 30	Module 31	Module 32	Module 33	Module 34	Module 35	Module 36	Module 37	Module 38	Module 39	Module 40	Module 41	Module 42	Module 43	Module 44	Module 45	Module 46	Module 47
1	rs12059860	Pitt as discovery	0.971526	0.79244	0.87115	0.359832	0.829253	0.117397	0.813148	0.674268	0.247284	0.713452	0.765159	0.333412	0.181231	0.731215	0.416127	0.784843	0.716291	0.87569	0.938006	0.269819	0.988869	0.467672	0.74407	0.594819	0.102948	0.117405	0.111528	0.578605	0.989445	0.93177	0.700169	0.646762	0.846999	0.280168	0.376812	0.176362	0.376863	0.455801	0.789098	0.177254	0.215874	0.997942	0.770123	0.691125	0.395204	0.406699	0.113573
		Penn State as discovery	0.933355	0.220225	0.786503	0.0864147	0.991629	0.599271	0.88421	0.526566	0.143936	0.964274	0.225573	0.612181	0.449008	0.572625	0.571503	0.371866	0.743497	0.532445	0.244466	0.492588	0.818096	0.0852035	0.945214	0.353199	0.711652	0.508206	0.0855968	0.469044	0.470432	0.808921	0.645273	0.328259	0.947397	0.405815	0.569262	0.207888	0.384686	0.0673169	0.992907	0.557423	0.274011	0.737409	0.672042	0.0544704	0.763458	0.636739	0.480546
		ALSPAC as discovery	0.968194	0.86588	0.986257	0.707046	0.84499	0.863214	0.628332	0.741427	0.402699	0.787216	0.829351	0.96624	0.367695	0.890026	0.40333	0.580761	0.987287	0.877576	0.173882	0.425032	0.844575	0.0858475	0.986183	0.747395	0.991839	0.357233	0.14009	0.791679	0.859792	0.600426	0.908382	0.288619	0.919595	0.626856	0.557509	0.210296	0.944217	0.0398913	0.61851	0.805398	0.142342	0.979934	0.366426	0.0321167	0.527579	0.635446	0.293123
1	rs17496332	Pitt as discovery	0.137957	0.245612	0.0796688	0.217067	0.100048	0.283646	0.698455	0.700596	0.317758	0.276011	0.118739	0.235431	0.877592	0.43845	0.719691	0.765568	0.249088	0.053968	0.677716	0.125736	0.417922	0.0879368	0.115208	0.379902	0.144485	0.767922	0.603268	0.585306	0.546577	0.487749	0.707971	0.171867	0.896254	0.326675	0.0483383	0.0465599	0.00962638	0.56127	0.227561	0.122124	0.115018	0.517071	0.72755	0.18937	0.139158	0.0679106	0.211293
		Penn State as discovery	0.690017	0.564081	0.822312	0.452567	0.298221	0.980022	0.842995	0.344163	0.941468	0.201806	0.36482	0.864291	0.986238	0.394633	0.745938	0.280799	0.281311	0.246468	0.796227	0.0599834	0.781821	0.198836	0.260836	0.941308	0.863508	0.882096	0.992597	0.2767	0.771786	0.715632	0.615884	0.0674566	0.273558	0.0966631	0.0454238	0.00280678	0.135011	0.680464	0.424736	0.218567	0.0249888	0.54833	0.779353	0.386651	0.297076	0.547403	0.388924
		ALSPAC as discovery	0.294703	0.429461	0.166284	0.384651	0.968978	0.572335	0.561594	0.308031	0.183472	0.864244	0.636513	0.467652	0.99676	0.809501	0.405001	0.249318	0.606724	0.0581986	0.215452	0.692814	0.692377	0.876055	0.483688	0.266058	0.673332	0.79442	0.732748	0.410113	0.544785	0.720692	0.50056	0.216917	0.146976	0.200613	0.344288	0.0267603	0.0669684	0.401593	0.746806	0.695037	0.886975	0.95383	0.211629	0.908818	0.950337	0.409388	0.844343
1	rs424950	Pitt as discovery	0.353635	0.0337223	0.135393	0.185006	0.288013	0.208597	0.117395	0.372403	0.343845	0.611555	0.565527	0.159701	0.232678	0.607991	0.995294	0.608037	0.219724	0.703236	0.652157	0.230809	0.62459	0.542771	0.973104	0.195943	0.600625	0.192379	0.719366	0.649772	0.472568	0.802929	0.996061	0.912755	0.101337	0.934603	0.479388	0.601726	0.950184	0.676579	0.263685	0.465444	0.757752	0.878948	0.185001	0.419525	0.312339	0.994275	0.511399
		Penn State as discovery	0.758561	0.352425	0.816457	0.355444	0.633911	0.729528	0.915708	0.761707	0.708491	0.686545	0.37984	0.276365	0.387014	0.692941	0.898461	0.799652	0.652811	0.31362	0.547729	0.40722	0.805837	0.170429	0.487631	0.683117	0.406678	0.459119	0.975547	0.203106	0.858281	0.842889	0.679327	0.933844	0.590291	0.879588	0.997841	0.366426	0.991888	0.217883	0.6765	0.832742	0.364747	0.927318	0.505165	0.583422	0.552286	0.464665	0.523572
		ALSPAC as discovery	0.302464	0.0683789	0.0659937	0.037861	0.298455	0.120545	0.588863	0.194424	0.403068	0.260198	0.300789	0.0760149	0.0159878	0.218657	0.618011	0.696037	0.40203	0.0967948	0.734199	0.344541	0.0982388	0.724522	0.609545	0.0380071	0.160584	0.0108344	0.718964	0.0534102	0.418496	0.637272	0.765798	0.785075	0.832196	0.72521	0.642021	0.094241	0.9295	0.642685	0.963349	0.211688	0.952881	0.906901	0.23956	0.936548	0.848997	0.490051	0.630113
1	rs909814	Pitt as discovery	0.597688	0.157702	0.0846173	0.012454	0.667476	0.147119	0.862997	0.115506	0.055276	0.652717	0.217246	0.0826562	0.0603844	0.750895	0.591855	0.521307	0.623469	0.874286	0.0126206	0.632225	0.671538	0.0581502	0.171838	0.024291	0.0753402	0.154507	0.555456	0.834031	0.737426	0.324208	0.840013	0.38838	0.588911	0.447545	0.0780603	0.35983	0.747147	0.496988	0.00651237	0.761627	0.349274	0.20771	0.79489	0.143679	0.0429563	0.0285748	0.274226
		Penn State as discovery	0.486072	0.880496	0.287227	0.703787	0.902028	0.184553	0.445861	0.837704	0.843446	0.65063	0.810676	0.10984	0.270404	0.998387	0.378381	0.935141	0.80027	0.961615	0.739649	0.102209	0.938758	0.435558	0.862791	0.011608	0.521645	0.3093	0.870333	0.993605	0.898402	0.698951	0.0862176	0.328028	0.789228	0.867607	0.336996	0.813321	0.517969	0.912168	0.229016	0.146076	0.908342	0.509306	0.77766	0.593381	0.145454	0.0199622	0.561948
		ALSPAC as discovery	0.573814	0.0533519	0.16095	0.085918	0.644695	0.144917	0.365182	0.343563	0.213462	0.262608	0.324991	0.0665066	0.152668	0.725126	0.171614	0.337648	0.110134	0.550969	0.315035	0.0436716	0.428603	0.175541	0.536226	0.0234148	0.393309	0.467349	0.933258	0.679151	0.53111	0.977963	0.0274503	0.077958	0.914129	0.738053	0.145012	0.554803	0.367772	0.461686	0.743001	0.215144	0.339001	0.227005	0.78475	0.286309	0.126895	0.119666	0.391852
2	rs6738028	Pitt as discovery	0.879896	0.336313	0.713086	0.40337	0.787899	0.967343	0.278436	0.690792	0.161971	0.415626	0.738098	0.598699	0.877579	0.62211	0.321866	0.907237	0.79283	0.885552	0.437694	0.365654	0.648302	0.0538282	0.921456	0.856189	0.986904	0.837702	0.241108	0.745454	0.195794	0.00299404	0.158595	0.919447	0.942191	0.792758	0.707561	0.649127	0.935867	0.785479	0.123728	0.489741	0.242699	0.388844	0.0325216	0.169021	0.10144	0.14779	0.424988
		Penn State as discovery	0.508561	0.749152	0.771531	0.918055	0.330271	0.13925	0.818333	0.769965	0.879364	0.367833	0.410512	0.506573	0.530061	0.343561	0.236572	0.766674	0.552634	0.768354	0.838898	0.438135	0.732503	0.301437	0.331222	0.698131	0.515825	0.845149	0.268207	0.645128	0.472263	0.0217522	0.180446	0.707688	0.548135	0.673258	0.95352	0.976717	0.646572	0.648273	0.319297	0.560786	0.217008	0.290513	0.0918901	0.0736386	0.220544	0.0312705	0.450134
		ALSPAC as discovery	0.491882	0.882365	0.553904	0.870889	0.991648	0.670526	0.602287	0.991252	0.456484	0.756742	0.528162	0.67168	0.0848408	0.8165	0.430929	0.659184	0.781037	0.863202	0.491976	0.743841	0.647082	0.0658745	0.427071	0.53722	0.866896	0.0696963	0.523478	0.904423	0.752418	0.02819	0.753648	0.844562	0.957202	0.509958	0.66359	0.740607	0.573293	0.463818	0.171049	0.393403	0.978822	0.405348	0.0568883	0.198905	0.543452	0.0609358	0.567648
2	rs780093	Pitt as discovery	0.938554	0.886355	0.6882	0.708585	0.847717	0.240597	0.719867	0.627814	0.587564	0.811022	0.462559	0.330169	0.969293	0.165374	0.42587	0.787575	0.866609	0.777278	0.735271	0.720794	0.751301	0.788681	0.477578	0.29777	0.728512	0.62626	0.950046	0.259482	0.495563	0.307242	0.755504	0.758815	0.533066	0.868905	0.938806	0.194697	0.734028	0.149204	0.388447	0.773012	0.632224	0.732968	0.436968	0.562115	0.892022	0.880526	0.606152
		Penn State as discovery	0.730659	0.380774	0.498412	0.26364	0.876348	0.0875713	0.114686	0.68495	0.0990098	0.245753	0.0576131	0.321893	0.882201	0.272638	0.348658	0.782682	0.650092	0.234889	0.463047	0.458913	0.442948	0.54899	0.534032	0.238175	0.158025	0.468251	0.376561	0.336917	0.198768	0.629049	0.516876	0.621188	0.482986	0.310898	0.32677	0.0237124	0.24056	0.302539	0.321014	0.402147	0.872182	0.169966	0.593913	0.201509	0.791696	0.330661	0.589436
		ALSPAC as discovery	0.210694	0.752005	0.0692808	0.866952	0.507105	0.034548	0.443932	0.559828	0.152348	0.880492	0.374636	0.104396	0.489648	0.583781	0.177941	0.939723	0.909341	0.731184	0.0899195	0.241623	0.718086	0.734102	0.123971	0.0152184	0.0250944	0.0127348	0.463369	0.912054	0.309545	0.392241	0.309735	0.889469	0.551419	0.578697	0.727621	0.83595	0.235077	0.549454	0.911389	0.608035	0.338007	0.147046	0.318628	0.619225	0.59219	0.146787	0.481878
3	rs3849491	Pitt as discovery	0.403046	0.405735	0.5805	0.906574	0.573804	0.231668	0.912884	0.930527	0.925236	0.93856	0.122136	0.180633	0.122996	0.850168	0.721195	0.369071	0.86694	0.720072	0.334045	0.524492	0.0908848	0.205641	0.107323	0.259856	0.426364	0.584368	0.293969	0.363746	0.872752	0.273468	0.780892	0.901076	0.813712	0.624549	0.939441	0.302439	0.874905	0.233491	0.728255	0.516803	0.369445	0.761289	0.598224	0.0434495	0.167948	0.502565	0.0175028
		Penn State as discovery	0.850567	0.73119	0.233369	0.303027	0.765144	0.013155	0.259428	0.79307	0.21427	0.42935	0.531854	0.0185441	0.435755	0.945276	0.297767	0.420628	0.654647	0.279593	0.0414853	0.0552774	0.0392555	0.0583833	0.462328	0.706544	0.10451	0.538268	0.310305	0.528908	0.958525	0.270169	0.866701	0.221346	0.630116	0.0914593	0.973776	0.100784	0.798101	0.0391246	0.229492	0.137744	0.148107	0.711296	0.00643068	0.322865	0.520206	0.356393	0.306879
		ALSPAC as discovery	0.402349	0.720877	0.433969	0.370597	0.280112	0.387085	0.166448	0.765321	0.502984	0.105767	0.217314	0.197049	0.147888	0.22951	0.123766	0.0604617	0.369267	0.125514	0.478863	0.191441	0.0323508	0.0828276	0.144208	0.165797	0.113567	0.0807399	0.333784	0.588781	0.513933	0.638684	0.381927	0.0931236	0.173016	0.0917292	0.917464	0.0200824	0.686027	0.68716	0.27977	0.068246	0.112765	0.113197	0.115331	0.00953209	0.133267	0.181368	0.0581762
5	rs10514317	Pitt as discovery	0.331861	0.608218	0.863257	0.448028	0.940888	0.695021	0.0693047	0.478126	0.573129	0.903803	0.941189	0.306894	0.293916	0.185918	0.0519668	0.418825	0.206871	0.731199	0.499115	0.275308	0.977752	0.627949	0.729898	0.326981	0.318087	0.772159	0.316687	0.453407	0.783162	0.195815	0.290453	0.390749	0.121268	0.132923	0.454496	0.994639	0.686972	0.826926	0.409985	0.441995	0.455887	0.986012	0.415143	0.746218	0.890113	0.592427	0.134338
		Penn State as discovery	0.924715	0.789713	0.991244	0.88604	0.621271	0.881687	0.807528	0.779878	0.524582	0.833374	0.206084	0.480133	0.484209	0.70884	0.570271	0.345661	0.836978	0.665601	0.481561	0.6528	0.8903	0.119806	0.138796	0.629496	0.741475	0.97307	0.256686	0.331307	0.994689	0.543294	0.970056	0.88661	0.87465	0.301564	0.57345	0.756352	0.987843	0.738511	0.206615	0.891785	0.744102	0.963074	0.0928053	0.120631	0.179503	0.226921	0.00950519
		ALSPAC as discovery	0.482494	0.465659	0.989487	0.845403	0.880489	0.891938	0.928306	0.440876	0.0912425	0.981355	0.690067	0.44976	0.190165	0.10411	0.96426	0.569703	0.310187	0.802314	0.0539852	0.997025	0.973424	0.603434	0.18633	0.157836	0.520127	0.798798	0.486537	0.627158	0.493687	0.520173	0.642458	0.905942	0.084246	0.201213	0.640531	0.520411	0.538279	0.57709	0.101398	0.965641	0.989601	0.93974	0.62808	0.399156	0.21838	0.331056	0.098979
7	rs11761528	Pitt as discovery	0.606041	0.693821	0.827421	0.77583	0.218087	0.394014	0.87341	0.929372	0.966034	0.47729	0.0584329	0.762221	0.324512	0.559829	0.3532	0.115121	0.81848	0.752787	0.917484	0.110503	0.273034	0.0259266	0.267968	0.912105	0.757056	0.665114	0.820338	0.347278	0.185734	0.274247	0.710541	0.340096	0.469118	0.3945	0.193444	0.585218	0.259482	0.554658	0.670993	0.131752	0.153937	0.323631	0.751166	0.0200357	0.0571878	0.0351565	0.875909
		Penn State as discovery	0.466959	0.97757	0.682298	0.966282	0.373272	0.534538	0.854574	0.515091	0.794776	0.666891	0.0336228	0.993799	0.518348	0.340298	0.498252	0.0190118	0.796073	0.416245	0.634652	0.0783285	0.605779	0.020996	0.494434	0.664919	0.789126	0.513963	0.500679	0.270869	0.602	0.917245	0.542498	0.330659	0.816367	0.631207	0.613918	0.42541	0.228716	0.449115	0.795358	0.0650431	0.274367	0.377826	0.351098	0.405154	0.275331	0.203995	0.673501
		ALSPAC as discovery	0.227558	0.520209	0.409945	0.51203	0.0811151	0.0348419	0.947722	0.320588	0.279205	0.448859	0.118932	0.48374	0.514905	0.351143	0.804184	0.00676695	0.437684	0.3882	0.235183	0.277619	0.179408	0.00731842	0.205197	0.474337	0.669082	0.443265	0.683466	0.786213	0.406396	0.825002	0.766122	0.0148874	0.0648218	0.739536	0.174148	0.401939	0.138462	0.75276	0.891087	0.432101	0.471689	0.507361	0.433298	0.598846	0.00248216	0.0156952	0.193815
7	rs3779195	Pitt as discovery	0.525515	0.943289	0.0643685	0.530901	0.338735	0.0683205	0.700556	0.390086	0.361536	0.0301377	0.601806	0.277879	0.261173	0.452069	0.0913809	0.362476	0.00278803	0.0726812	0.258084	0.487534	0.0669349	0.952844	0.370464	0.355293	0.472129	0.977269	0.0682818	0.601893	0.707573	0.0166664	0.49279	0.94077	0.0746854	0.0048885	0.329854	0.514736	0.0711935	0.761558	0.0648089	0.710069	0.0394779	0.797531	0.169521	0.607034	0.110011	0.427561	0.879479
		Penn State as discovery	0.163237	0.214872	0.178888	0.706893	0.16615	0.536685	0.0417729	0.174389	0.206613	0.0153926	0.063196	0.202004	0.0664233	0.344336	0.0124879	0.419517	0.00893523	0.294296	0.162158	0.455832	0.207124	0.497524	0.296724	0.956557	0.0747326	0.807976	0.234519	0.291741	0.451758	0.0660142	0.107013	0.60729	0.0239327	0.0327837	0.332508	0.522245	0.212493	0.410167	0.490692	0.870677	0.0877086	0.175553	0.15298	0.642812	0.0407428	0.154853	0.489205
		ALSPAC as discovery	0.443516	0.274101	0.716702	0.198219	0.589286	0.318751	0.574134	0.137048	0.384141	0.0518922	0.545436	0.0460102	0.048066	0.25856	0.393884	0.191308	0.0190968	0.142133	0.410435	0.222312	0.149205	0.416862	0.286651	0.031046	0.450959	0.617012	0.069634	0.0771701	0.206697	0.244965	0.46006	0.133435	0.397287	0.0035984	0.707953	0.397134	0.20503	0.150709	0.10871	0.258467	0.0524411	0.0612057	0.894158	0.582127	0.103264	0.26914	0.683236
7	rs740160	Pitt as discovery	0.436945	0.759172	0.220074	0.218899	0.451596	0.793634	0.137481	0.493493	0.505848	0.634005	0.900164	0.713359	0.818412	0.00634212	0.592261	0.239347	0.203884	0.229768	0.923967	0.642682	0.560212	0.383941	0.840052	0.733166	0.908502	0.895964	0.740139	0.045356	0.0622152	0.636548	0.215505	0.722954	0.380254	0.487372	0.172027	0.248023	0.522659	0.599162	0.994524	0.9638	0.360165	0.147511	0.990342	0.640507	0.654667	0.558053	0.368743
		Penn State as discovery	0.180101	0.964831	0.214427	0.994539	0.96167	0.848678	0.269463	0.681308	0.844037	0.666687	0.627218	0.77478	0.87606	0.104752	0.167155	0.648318	0.958199	0.580905	0.995905	0.864455	0.739221	0.16328	0.787896	0.517612	0.830284	0.930312	0.450024	0.387621	0.225234	0.952755	0.257639	0.88518	0.591461	0.9931	0.893885	0.250807	0.529195	0.819565	0.940686	0.439239	0.664579	0.639277	0.786778	0.918882	0.534794	0.977363	0.667716
		ALSPAC as discovery	0.46707	0.935678	0.414749	0.317242	0.883927	0.22409	0.851257	0.621602	0.474938	0.590995	0.546839	0.376099	0.947858	0.144797	0.252143	0.532916	0.831427	0.229426	0.684982	0.919493	0.112245	0.35868	0.765846	0.481194	0.407018	0.497718	0.214524	0.580524	0.187057	0.483634	0.670698	0.936764	0.487313	0.586829	0.716937	0.612111	0.631329	0.43436	0.62816	0.654826	0.427754	0.272084	0.796888	0.574958	0.478151	0.663107	0.858622
8	rs440837	Pitt as discovery	0.120808	0.207233	0.28446	0.349596	0.273306	0.755341	0.673668	0.380475	0.27715	0.191018	0.482162	0.130322	0.760529	0.604298	0.637693	0.920079	0.807582	0.352175	0.339509	0.735612	0.111615	0.219733	0.443539	0.342987	0.633342	0.868531	0.0931377	0.658931	0.522394	0.416984	0.0721613	0.652695	0.753451	0.621018	0.675265	0.87504	0.193006	0.0429823	0.807232	0.553129	0.76483	0.613929	0.189643	0.997857	0.202647	0.270549	0.165629
		Penn State as discovery	0.209365	0.202841	0.38535	0.00909406	0.0922763	0.895478	0.284595	0.116851	0.0023469	0.0820159	0.213843	0.511437	0.402304	0.719524	0.27994	0.0756205	0.838787	0.0558177	0.0143152	0.0542962	0.349853	0.0872682	0.226415	0.652875	0.899774	0.833249	0.0480002	0.218254	0.480778	0.253433	0.138119	0.0676064	0.585021	0.510062	0.993098	0.710504	0.429753	0.00281221	0.759277	0.0162374	0.229644	0.238714	0.518722	0.38647	0.0356287	0.250527	0.0838109
		ALSPAC as discovery	0.853694	0.289104	0.651854	0.206734	0.267118	0.586843	0.866054	0.674467	0.0801413	0.211131	0.758433	0.284044	0.855672	0.477592	0.72614	0.216516	0.831259	0.550503	0.115688	0.0119973	0.0895947	0.211889	0.840224	0.523345	0.712979	0.79257	0.215661	0.821052	0.508895	0.59508	0.268504	0.299763	0.581711	0.121104	0.794844	0.922306	0.827804	0.0773021	0.725494	0.0303189	0.135665	0.616306	0.228525	0.0898773	0.22733	0.928234	0.50818
10	rs10795130	Pitt as discovery	0.016964	0.130158	0.281538	0.103765	0.769978	0.0563105	0.895194	0.273601	0.139472	0.424525	0.830293	0.0297375	0.460598	0.558254	0.869451	0.204878	0.0247577	0.424331	0.165802	0.261168	0.272951	0.712277	0.800065	0.0499082	0.424436	0.221302	0.759552	0.654621	0.789257	0.398654	0.947487	0.875049	0.0857805	0.0735186	0.0754752	0.134322	0.308187	0.700078	0.285547	0.174653	0.669161	0.495309	0.096295	0.920342	0.515539	0.133495	0.841266
		Penn State as discovery	0.156395	0.90334	0.0912851	0.569564	0.858348	0.159926	0.252053	0.12479	0.404731	0.903493	0.878772	0.0316713	0.279363	0.309888	0.332857	0.162381	0.282422	0.655306	0.167192	0.72077	0.856689	0.253875	0.878153	0.0155892	0.408009	0.188086	0.452207	0.195317	0.3383	0.404725	0.122305	0.900701	0.0720739	0.483126	0.360541	0.326827	0.491224	0.583117	0.0477805	0.686714	0.226713	0.847749	0.210944	0.153314	0.194765	0.533919	0.645517
		ALSPAC as discovery	0.0583824	0.0642753	0.383799	0.180301	0.0446178	0.47867	0.767384	0.0529895	0.18107	0.0448555	0.817915	0.519538	0.45842	0.404437	0.585028	0.554275	0.0289463	0.463467	0.14039	0.0196138	0.279897	0.481635	0.543696	0.230834	0.183873	0.268316	0.761286	0.0986311	0.962868	0.395843	0.676418	0.604568	0.24572	0.187765	0.307288	0.489556	0.333399	0.114664	0.714584	0.0456329	0.284586	0.311842	0.16821	0.232228	0.465174	0.149588	0.315195
10	rs10822184	Pitt as discovery	0.466672	0.444342	0.44092	0.331368	0.547855	0.80767	0.323542	0.0196451	0.342528	0.524438	0.790897	0.411421	0.284198	0.0930491	0.758281	0.054458	0.783326	0.00436469	0.643806	0.400046	0.690614	0.350383	0.695666	0.947792	0.394046	0.799852	0.25282	0.407148	0.0201127	0.846811	0.217315	0.0286148	0.883594	0.893824	0.301714	0.00270855	0.433234	0.284751	0.392755	0.00612501	0.646676	0.674739	0.931552	0.578347	0.188694	0.553796	0.853087
		Penn State as discovery	0.349958	0.183476	0.367058	0.299185	0.92383	0.546855	0.375595	0.158304	0.220959	0.291737	0.719386	0.472895	0.662604	0.59103	0.769219	0.434823	0.802372	0.292987	0.264609	0.0952572	0.663123	0.339889	0.893581	0.206915	0.180341	0.936434	0.672164	0.494812	0.698589	0.984938	0.711987	0.400203	0.925619	0.320814	0.577811	0.0651801	0.572632	0.384613	0.545547	0.0045147	0.253164	0.896098	0.657066	0.34847	0.442213	0.739976	0.993133
		ALSPAC as discovery	0.143742	0.647291	0.170805	0.933772	0.4898	0.65488	0.0387051	0.0548186	0.618129	0.595558	0.840549	0.681844	0.568655	0.555797	0.134388	0.0762642	0.53008	0.337449	0.879868	0.798331	0.411188	0.59301	0.884944	0.545524	0.720702	0.806525	0.384222	0.689307	0.38581	0.697095	0.295281	0.0139333	0.995246	0.724614	0.462045	0.0947187	0.985675	0.719566	0.826063	0.774793	0.252253	0.841512	0.54684	0.787131	0.734925	0.325371	0.989255
10	rs10822186	Pitt as discovery	0.404476	0.53539	0.35982	0.289643	0.524886	0.618625	0.308301	0.0200494	0.260835	0.597255	0.724917	0.473053	0.248598	0.158918	0.746189	0.0517765	0.83652	0.00464115	0.752629	0.386441	0.617126	0.290449	0.678272	0.811711	0.515911	0.695692	0.249484	0.185907	0.0291179	0.763605	0.229979	0.0305384	0.720749	0.895453	0.333325	0.00263014	0.687906	0.281435	0.408192	0.00932278	0.550416	0.685034	0.815234	0.485763	0.169349	0.460392	0.877354
		Penn State as discovery	0.336079	0.173032	0.329543	0.298938	0.793056	0.501763	0.342473	0.187641	0.207716	0.482263	0.745293	0.448033	0.646502	0.586373	0.766992	0.496244	0.813133	0.268783	0.279349	0.183761	0.518455	0.370273	0.873525	0.172846	0.218996	0.908662	0.66094	0.490781	0.727395	0.959736	0.727453	0.38861	0.780253	0.32567	0.61803	0.071938	0.559434	0.371062	0.658975	0.00815797	0.302688	0.916024	0.460253	0.344944	0.519579	0.641463	0.989941
		ALSPAC as discovery	0.0871928	0.682255	0.141352	0.934084	0.577925	0.741848	0.053468	0.0463787	0.600535	0.768173	0.845675	0.723005	0.541353	0.534328	0.166465	0.0705027	0.580682	0.306508	0.856625	0.782419	0.400152	0.610077	0.819389	0.601569	0.70809	0.76265	0.455608	0.633198	0.347674	0.736547	0.403794	0.0147386	0.960188	0.605579	0.596881	0.0854426	0.966301	0.673672	0.832843	0.685115	0.236143	0.855257	0.524981	0.819523	0.704209	0.23667	0.962192
10	rs2185570	Pitt as discovery	0.502144	0.0957045	0.236244	0.207981	0.590987	0.136805	0.220895	0.970344	0.364968	0.6802	0.590846	0.202745	0.187265	0.233034	0.0899865	0.110433	0.530003	0.460643	0.17657	0.265803	0.555712	0.671654	0.38511	0.0701892	0.277023	0.117461	0.981736	0.17807	0.260305	0.110377	0.100219	0.171726	0.343996	0.875393	0.407154	0.629727	0.563895	0.688153	0.270182	0.432212	0.899379	0.897332	0.812048	0.84552	0.646778	0.568263	0.953091
		Penn State as discovery	0.551886	0.357689	0.233999	0.837224	0.458775	0.151704	0.305902	0.88046	0.944902	0.592945	0.579082	0.88262	0.140043	0.0192209	0.61509	0.194903	0.756618	0.99165	0.667112	0.267963	0.386212	0.578633	0.21487	0.6009	0.738294	0.108164	0.737541	0.0281604	0.154979	0.155007	0.594134	0.0486587	0.310162	0.822875	0.567049	0.938946	0.628689	0.809952	0.495296	0.859472	0.913677	0.407517	0.410701	0.878532	0.655711	0.161412	0.495785
		ALSPAC as discovery	0.939702	0.331865	0.385961	0.75343	0.58601	0.481049	0.722644	0.383264	0.98598	0.535016	0.489346	0.753205	0.878784	0.225968	0.631336	0.411052	0.29994	0.318524	0.797171	0.353167	0.492205	0.146642	0.125326	0.244311	0.733088	0.259697	0.151904	0.601486	0.708377	0.194391	0.14536	0.036952	0.0658988	0.299263	0.454453	0.501886	0.780755	0.258042	0.990485	0.567456	0.647709	0.215055	0.606302	0.128457	0.264486	0.155405	0.339068
10	rs7910927	Pitt as discovery	0.600236	0.655287	0.747865	0.406994	0.887354	0.781865	0.168203	0.0315492	0.185463	0.256414	0.907261	0.128996	0.525034	0.13994	0.751528	0.138886	0.866696	0.0126173	0.538674	0.161032	0.96177	0.65117	0.824732	0.465603	0.452401	0.84657	0.450044	0.113614	0.0619863	0.972319	0.330713	0.0265669	0.802456	0.861854	0.598483	0.012808	0.437327	0.541696	0.58598	0.00111467	0.734456	0.57312	0.662815	0.712579	0.28183	0.857614	0.848329
		Penn State as discovery	0.453997	0.260216	0.423327	0.336119	0.554253	0.646004	0.356774	0.215365	0.203684	0.359928	0.650259	0.515358	0.859577	0.520435	0.678466	0.168104	0.64435	0.448086	0.424444	0.0923376	0.646525	0.39245	0.801287	0.157034	0.0593428	0.882493	0.803427	0.49605	0.875889	0.949389	0.652644	0.37402	0.926188	0.384155	0.650288	0.187352	0.579359	0.29612	0.38371	0.00478361	0.336939	0.953337	0.547186	0.71966	0.399891	0.766432	0.976259
		ALSPAC as discovery	0.285156	0.367792	0.241381	0.568881	0.614094	0.64764	0.159263	0.0336644	0.155359	0.389518	0.920612	0.460816	0.708047	0.492171	0.246975	0.0527401	0.641266	0.555109	0.707227	0.30005	0.871675	0.811154	0.964146	0.683519	0.92176	0.9726	0.274709	0.855241	0.305539	0.943052	0.640201	0.0146235	0.977765	0.460885	0.655905	0.292648	0.834737	0.598787	0.837098	0.659161	0.118331	0.791779	0.915731	0.984948	0.574941	0.444049	0.974099
15	rs7181230	Pitt as discovery	0.897472	0.76408	0.895316	0.580229	0.959237	0.856353	0.85142	0.423248	0.26518	0.912815	0.797757	0.841832	0.881207	0.79731	0.480571	0.53258	0.650316	0.725604	0.101198	0.884054	0.877673	0.826164	0.456831	0.478049	0.928577	0.588019	0.605692	0.399707	0.915301	0.67458	0.447568	0.0517197	0.169012	0.803446	0.123303	0.71811	0.927976	0.249906	0.209046	0.778696	0.952593	0.936521	0.15618	0.807093	0.892113	0.286296	0.218164
		Penn State as discovery	0.818704	0.703592	0.942954	0.756261	0.384199	0.565645	0.879365	0.143185	0.435657	0.476824	0.493178	0.956616	0.790085	0.717125	0.883733	0.716546	0.203528	0.660828	0.475873	0.799393	0.822559	0.351474	0.595431	0.96033	0.151709	0.888602	0.295188	0.470438	0.67311	0.614058	0.996371	0.535756	0.360148	0.849602	0.0486364	0.89761	0.497197	0.558993	0.347884	0.544666	0.747281	0.588626	0.713184	0.471242	0.537821	0.500275	0.713647
		ALSPAC as discovery	0.858083	0.684922	0.870545	0.643347	0.950491	0.376107	0.446584	0.0782603	0.401999	0.918582	0.652939	0.709914	0.517491	0.249821	0.413364	0.833491	0.108503	0.824167	0.826706	0.950373	0.867067	0.717166	0.400092	0.430672	0.445626	0.634999	0.19098	0.700702	0.307243	0.934815	0.360949	0.464329	0.445131	0.547686	0.227994	0.372331	0.385352	0.55043	0.504704	0.930636	0.9041	0.67815	0.95454	0.582948	0.621541	0.56851	0.304056
15	rs8023580	Pitt as discovery	0.256984	0.242664	0.166047	0.137013	0.798721	0.111137	0.116789	0.0274914	0.346962	0.608145	0.503389	0.0406691	0.616696	0.063307	0.0700865	0.426549	0.0763929	0.675475	0.71563	0.0885948	0.46497	0.188339	0.209863	0.146057	0.222136	0.271572	0.656153	0.0658475	0.832898	0.780446	0.0497796	0.476897	0.447445	0.00679975	0.46349	0.185358	0.6435	0.53106	0.512699	0.328961	0.289884	0.378741	0.788763	0.177905	0.395199	0.0910175	0.389688
		Penn State as discovery	0.0258873	0.130785	0.0290291	0.148505	0.282628	0.900299	0.0122328	0.00899033	0.542396	0.0773883	0.340516	0.75893	0.558685	0.0222627	0.0118847	0.454042	0.155399	0.572038	0.410425	0.0972384	0.066156	0.0759745	0.707613	0.978013	0.94571	0.405627	0.574139	0.0222691	0.512248	0.165241	0.0598728	0.506447	0.540601	0.000899525	0.350968	0.647343	0.729901	0.663928	0.0797915	0.118847	0.059122	0.0661235	0.290081	0.196699	0.0459326	0.543781	0.948187
		ALSPAC as discovery	0.125733	0.229742	0.271328	0.152579	0.0485892	0.418691	0.863633	0.0425735	0.345124	0.0158698	0.190765	0.0691277	0.420413	0.897143	0.865204	0.836821	0.283139	0.902242	0.178288	0.000649784	0.0383635	0.019906	0.23272	0.509479	0.167986	0.550791	0.386192	0.78364	0.68828	0.120461	0.305044	0.0925827	0.730094	0.0168697	0.846872	0.75734	0.796677	0.357535	0.41597	0.000839828	0.0011623	0.0642304	0.150512	0.114287	0.221916	0.410665	0.482794
16	rs12596210	Pitt as discovery	0.716476	0.575263	0.511891	0.568993	0.678226	0.516236	0.860056	0.938196	0.286308	0.887688	0.533389	0.93116	0.764702	0.861832	0.454078	0.598261	0.486003	0.42198	0.199221	0.347083	0.302764	0.54929	0.0933679	0.961805	0.31797	0.342525	0.609684	0.177832	0.853444	0.212465	0.679167	0.325868	0.3557	0.733189	0.725973	0.443575	0.562739	0.448138	0.199123	0.431837	0.347278	0.126603	0.893939	0.963174	0.618916	0.132134	0.197588
		Penn State as discovery	0.220618	0.063253	0.678867	0.607803	0.162637	0.890107	0.755635	0.322697	0.17721	0.542029	0.0518166	0.810442	0.952416	0.960133	0.565438	0.556902	0.538741	0.0321207	0.106301	0.0331993	0.343923	0.0351242	0.0201428	0.953243	0.461482	0.583186	0.358107	0.833231	0.822384	0.714981	0.404278	0.470237	0.173145	0.18917	0.422567	0.137581	0.121927	0.0986801	0.584646	0.103892	0.0263231	0.14203	0.963949	0.0638351	0.326553	0.120507	0.310251
		ALSPAC as discovery	0.569751	0.0733268	0.815058	0.012078	0.533458	0.988148	0.587956	0.349373	0.00787012	0.823711	0.343025	0.867833	0.582922	0.985895	0.914642	0.754705	0.413842	0.0694542	0.00509699	0.0401957	0.461341	0.111976	0.471924	0.999089	0.83371	0.123782	0.164939	0.302136	0.653465	0.913256	0.140736	0.53363	0.362787	0.446826	0.770218	0.126831	0.0515604	0.0312531	0.173319	0.123757	0.0218016	0.478611	0.492386	0.417451	0.455438	0.141631	0.647732
17	rs12150660	Pitt as discovery	6.0754e-06	0.000252403	9.73338e-07	0.19474	1.17836e-05	1.06702e-07	0.0535246	0.239705	0.664826	0.00172838	1.14615e-05	1.21617e-06	0.00169544	0.155583	0.114859	0.131041	0.400966	0.270762	0.812441	0.00548636	0.00430765	0.00716964	6.54777e-06	1.40945e-06	0.00214458	0.000165003	0.40954	0.225167	0.107936	0.0445284	0.821302	0.847199	0.519433	0.468739	0.490318	0.448093	0.450076	0.52915	0.373302	0.00161886	0.00176257	0.000905261	0.00061696	0.00889881	0.180423	0.000507344	0.0748929
		Penn State as discovery	2.48224e-08	7.77556e-05	1.62894e-07	0.000911689	0.000884108	7.0782e-06	0.00331016	0.0261957	0.256944	0.00283024	0.0133044	1.79931e-06	0.000421085	0.0555364	0.00284053	0.00219533	0.0785494	0.871594	0.166621	0.00267363	0.00179461	0.0194404	0.00933168	1.2322e-07	0.00753304	0.000398156	0.0504875	0.33732	0.0256871	0.190275	0.00183717	0.127156	0.07387	0.142164	0.176307	0.398626	0.730239	0.0423999	0.133541	0.000352769	0.000351837	0.00193713	0.00595535	0.0613403	0.14077	0.00786106	0.7229
		ALSPAC as discovery	2.81844e-06	1.31626e-05	2.08723e-06	0.00123637	1.12036e-05	5.02962e-05	7.40298e-05	0.0114563	0.0275316	0.00813886	1.89622e-05	7.30676e-05	9.00355e-05	0.0596916	0.0269674	0.00567686	0.0788391	0.391247	0.761365	0.0218035	0.0378251	0.0609723	4.70563e-06	6.35322e-08	0.115158	8.84051e-05	0.0106024	0.136352	0.0520396	0.0454271	0.260644	0.139195	0.464758	0.60687	0.0159908	0.414508	0.833294	0.266334	0.287153	0.0190872	0.0077515	0.00107088	0.00600495	0.531193	0.156729	0.000803396	0.0518331
17	rs1641549	Pitt as discovery	0.0353477	0.0803843	0.0567965	0.274594	0.364943	0.148846	0.846923	0.194247	0.200306	0.69331	0.0241847	0.0291665	0.00733479	0.0434869	0.531524	0.232871	0.216086	0.321254	0.673662	0.155062	0.357188	0.0475997	0.0654599	0.00254191	0.457748	0.0145427	0.924399	0.0525186	0.201527	0.508007	0.868463	0.841745	0.111616	0.393407	0.678091	0.216757	0.751405	0.399931	0.709833	0.668668	0.29173	0.425647	0.307064	0.0526379	0.0527173	0.127639	0.586752
		Penn State as discovery	0.00483863	0.0491456	0.0318327	0.0157337	0.213153	0.646823	0.0167913	0.00594016	0.0908821	0.771951	0.147233	0.192894	0.0324831	0.0196638	0.113843	0.16991	0.0236623	0.604069	0.208773	0.373438	0.089359	0.0838764	0.601912	0.0686064	0.450298	0.0116766	0.482602	0.0125516	0.112764	0.189527	0.291276	0.398558	0.202813	0.731909	0.0181807	0.360588	0.730859	0.093372	0.309938	0.469086	0.930238	0.241239	0.613167	0.100061	0.097795	0.575601	0.542619
		ALSPAC as discovery	0.239826	0.253215	0.363095	0.237635	0.298557	0.352102	0.381162	0.254599	0.835325	0.330104	0.0250745	0.175505	0.0643214	0.529903	0.631595	0.0722891	0.733398	0.95622	0.670319	0.257529	0.230743	0.0437751	0.147556	0.15638	0.0645439	0.00809067	0.814164	0.0857634	0.795347	0.521613	0.418895	0.509639	0.116918	0.93858	0.373977	0.415038	0.962116	0.145546	0.865828	0.130366	0.727797	0.167197	0.148872	0.0706297	0.114475	0.267169	0.744604
17	rs1799941	Pitt as discovery	0.000143814	0.0311803	1.75239e-05	0.878639	0.0013796	7.46708e-06	0.0498973	0.843093	0.69828	0.00482007	0.000461324	6.14503e-06	0.0245022	0.073797	0.240622	0.522018	0.58786	0.49245	0.864228	0.004769	0.0792916	0.0156977	0.00118282	5.10618e-05	0.00225076	0.00112186	0.916093	0.225968	0.0462312	0.0679942	0.681743	0.950474	0.798236	0.74046	0.563703	0.621883	0.634291	0.755959	0.78255	0.00520464	0.000519428	0.00345649	0.0193109	0.0194504	0.347101	0.0106148	0.201104
		Penn State as discovery	5.10288e-06	0.000284363	2.40204e-05	0.00146763	0.014456	0.00229578	0.0110984	0.0479711	0.289377	0.00687273	0.062016	0.000980302	0.0142765	0.230103	0.00878964	0.0151601	0.0745369	0.595135	0.0466195	0.00553872	0.0171685	0.0322178	0.285931	8.09314e-05	0.105815	0.00536728	0.206593	0.317155	0.0581071	0.133866	0.011212	0.140738	0.232745	0.211521	0.038	0.733631	0.895854	0.0283828	0.119039	0.00256143	0.000111758	0.00142062	0.0694064	0.244343	0.258105	0.0969278	0.837179
		ALSPAC as discovery	1.994e-05	0.000373758	9.43095e-06	0.00480171	0.0032023	0.00166678	0.000292625	0.0352286	0.0326795	0.0719863	0.00165788	0.00208257	0.00674292	0.0490962	0.104432	0.0102202	0.03751	0.576847	0.35232	0.146909	0.249862	0.304381	0.000661381	2.88503e-06	0.0371118	0.00234568	0.431049	0.0735037	0.084208	0.119294	0.155355	0.166699	0.397401	0.648929	0.0600091	0.33468	0.804852	0.237864	0.145856	0.120974	0.0250707	0.00513501	0.129541	0.955827	0.378194	0.00898659	0.155475
17	rs2075230	Pitt as discovery	0.618863	0.759723	0.822448	0.401296	0.700211	0.135528	0.768718	0.812749	0.26176	0.0309806	0.804272	0.145267	0.564541	0.914071	0.564306	0.986332	0.727698	0.0433739	0.844925	0.763799	0.786477	0.800411	0.569542	0.110596	0.95907	0.540046	0.706588	0.339435	0.832635	0.373946	0.839843	0.830019	0.866242	0.387334	0.889479	0.553978	0.167251	0.855107	0.201404	0.307592	0.444677	0.816714	0.424387	0.682865	0.9921	0.367834	0.0573449
		Penn State as discovery	0.681241	0.683786	0.724562	0.702373	0.486313	0.960353	0.728068	0.965509	0.337662	0.0645004	0.826854	0.647069	0.428516	0.945963	0.601977	0.965112	0.637786	0.00990632	0.791141	0.755504	0.728363	0.515174	0.977758	0.947285	0.878673	0.636577	0.789645	0.625768	0.739654	0.994547	0.871419	0.845026	0.727801	0.141525	0.643892	0.12192	0.151899	0.922297	0.426043	0.791055	0.649551	0.429494	0.522777	0.282697	0.951844	0.817638	0.607379
		ALSPAC as discovery	0.26567	0.476206	0.223975	0.34037	0.300095	0.196948	0.795507	0.457475	0.578264	0.0531744	0.790099	0.229144	0.129038	0.681101	0.619304	0.980617	0.347275	0.177986	0.963022	0.255062	0.539482	0.654236	0.663319	0.288367	0.935377	0.0785413	0.274473	0.10306	0.148249	0.739656	0.825076	0.950805	0.951651	0.247109	0.686453	0.511909	0.317338	0.844528	0.691565	0.17113	0.810001	0.691999	0.764275	0.779011	0.827843	0.477988	0.194666
17	rs2411984	Pitt as discovery	0.045825	0.67515	0.119749	0.519219	0.456272	0.518937	0.521783	0.590542	0.920272	0.48202	0.621695	0.893616	0.346997	0.51392	0.542961	0.587384	0.636692	0.315148	0.451352	0.495833	0.391712	0.841746	0.427101	0.853885	0.711703	0.178365	0.39434	0.244307	0.247058	0.0760931	0.82098	0.808577	0.855715	0.943103	0.200509	0.984131	0.064601	0.293399	0.752335	0.350704	0.422934	0.734872	0.391508	0.644228	0.548913	0.221249	0.293902
		Penn State as discovery	0.549966	0.139708	0.875043	0.419318	0.224242	0.865228	0.610844	0.471	0.98257	0.881127	0.319742	0.913472	0.791147	0.270662	0.480683	0.0632211	0.775131	0.456658	0.693282	0.37884	0.445226	0.466782	0.413026	0.342928	0.99684	0.374878	0.357802	0.251507	0.160933	0.735788	0.129399	0.322069	0.345564	0.764768	0.124697	0.617567	0.240797	0.621931	0.730764	0.304899	0.868279	0.598704	0.189778	0.329211	0.463095	0.599644	0.204918
		ALSPAC as discovery	0.85746	0.927121	0.522921	0.566123	0.8399	0.865963	0.961649	0.85143	0.946842	0.645865	0.858352	0.557957	0.0455667	0.893859	0.848048	0.57891	0.956531	0.460213	0.763543	0.335698	0.41498	0.553159	0.843727	0.569789	0.252596	0.206727	0.139185	0.551082	0.786335	0.785714	0.478634	0.155513	0.709833	0.973365	0.502576	0.785867	0.120541	0.252481	0.534544	0.29719	0.531408	0.328076	0.780727	0.425227	0.298364	0.64874	0.540013
17	rs727428	Pitt as discovery	0.10017	0.845738	0.0787435	0.867107	0.841031	0.0127458	0.320829	0.492457	0.776989	0.834117	0.643415	0.0202413	0.0607779	0.570276	0.480227	0.802522	0.458059	0.771913	0.856176	0.321354	0.600728	0.0511398	0.394465	0.0452823	0.186323	0.145154	0.119543	0.627927	0.94086	0.814946	0.241417	0.974957	0.75313	0.139262	0.26045	0.461561	0.822475	0.718301	0.141248	0.0820611	0.139499	0.968139	0.39524	0.0252185	0.950881	0.202101	0.498954
		Penn State as discovery	0.0452623	0.71151	0.0589276	0.397346	0.512683	0.0554898	0.107227	0.437947	0.742501	0.345965	0.596552	0.380416	0.00971003	0.0534164	0.265798	0.376278	0.385679	0.747833	0.79636	0.0864999	0.111256	0.0215946	0.341574	0.0562463	0.756119	0.0106829	0.65828	0.233711	0.502438	0.684344	0.197743	0.979501	0.702049	0.542703	0.119224	0.643894	0.285875	0.926965	0.826371	0.024148	0.0500948	0.639017	0.0700167	0.0232121	0.917839	0.428571	0.709096
		ALSPAC as discovery	9.24853e-05	0.233697	0.00112984	0.698892	0.232835	0.00536961	0.401602	0.160016	0.556709	0.186947	0.211107	0.0167651	0.00526786	0.0219189	0.162279	0.398386	0.600908	0.311383	0.959723	0.148146	0.0924779	0.0519333	0.518048	0.00581691	0.107501	0.000770154	0.0876397	0.2525	0.359117	0.967598	0.442589	0.982014	0.262023	0.323155	0.168372	0.488106	0.405066	0.474397	0.88479	0.0133824	0.0582831	0.706242	0.0223359	0.0458467	0.976707	0.336611	0.4163
17	rs72829446	Pitt as discovery	0.204794	0.105394	0.486009	0.159061	0.817248	0.153885	0.117816	0.582053	0.0728026	0.77137	0.898737	0.0711157	0.0832381	0.265897	0.112627	0.303377	0.946097	0.506457	0.0840588	0.459459	0.352909	0.576953	0.680373	0.158592	0.636632	0.0105135	0.186094	0.324578	0.477101	0.597748	0.093095	0.911584	0.727805	0.435649	0.889804	0.107978	0.862302	0.648108	0.0296372	0.270932	0.286136	0.564477	0.353049	0.691542	0.451744	0.659882	0.613793
		Penn State as discovery	0.418912	0.162976	0.8056	0.0389809	0.398775	0.711487	0.174843	0.200027	0.135251	0.823076	0.449449	0.401422	0.219427	0.941562	0.386684	0.085899	0.785725	0.687297	0.20497	0.89144	0.213672	0.767334	0.591434	0.248516	0.469791	0.0366097	0.328492	0.997906	0.928725	0.167369	0.409402	0.854676	0.399406	0.455151	0.697947	0.120491	0.559398	0.791994	0.196955	0.959517	0.505471	0.236222	0.369782	0.824867	0.90455	0.292972	0.348849
		ALSPAC as discovery	0.0851472	0.0238846	0.116512	0.0294914	0.43817	0.334583	0.023758	0.277505	0.138853	0.695433	0.73935	0.524417	0.0360105	0.162707	0.108339	0.0368463	0.763471	0.717962	0.107773	0.54748	0.341705	0.386392	0.663877	0.168882	0.62188	0.0159535	0.073515	0.787047	0.127595	0.0620318	0.284271	0.795896	0.208557	0.478445	0.644712	0.241895	0.169079	0.511208	0.121205	0.67894	0.396987	0.227807	0.620062	0.195764	0.320698	0.482493	0.264507
17	rs8077059	Pitt as discovery	0.998679	0.423158	0.975638	0.801597	0.828423	0.77588	0.967477	0.938345	0.444907	0.787685	0.864177	0.256719	0.555232	0.529167	0.932154	0.78444	0.66841	0.655286	0.366546	0.848623	0.874578	0.992585	0.515185	0.825936	0.0988539	0.308661	0.46411	0.690211	0.477192	0.550894	0.807957	0.833584	0.737831	0.96067	0.299527	0.678382	0.974029	0.112886	0.43452	0.923321	0.40611	0.683298	0.585192	0.700637	0.863899	0.545699	0.473061
		Penn State as discovery	0.566496	0.903625	0.482431	0.990516	0.98064	0.459796	0.972107	0.658891	0.971237	0.751169	0.846736	0.152566	0.614082	0.445498	0.816425	0.614517	0.895492	0.815087	0.952547	0.912114	0.982185	0.962717	0.40221	0.700412	0.0685578	0.371351	0.58286	0.52516	0.400686	0.837588	0.665249	0.686076	0.327025	0.96324	0.39837	0.914554	0.774518	0.852045	0.681294	0.976881	0.737267	0.741596	0.907017	0.498888	0.885968	0.61062	0.267495
		ALSPAC as discovery	0.735834	0.402579	0.438429	0.428543	0.714084	0.607635	0.757033	0.346812	0.939374	0.464354	0.702743	0.0157526	0.9779	0.780696	0.233111	0.363122	0.798576	0.949333	0.898399	0.785303	0.865751	0.980096	0.383686	0.910228	0.00985723	0.886576	0.481458	0.844254	0.427759	0.494562	0.225698	0.197432	0.585599	0.652415	0.114167	0.979845	0.812404	0.633442	0.704246	0.743429	0.528939	0.878283	0.755542	0.554472	0.684735	0.381088	0.746887
17	rs9905820	Pitt as discovery	0.312028	0.465305	0.608001	0.586503	0.211618	0.971009	0.374085	0.775765	0.716354	0.0676949	0.994715	0.738383	0.850813	0.383304	0.101516	0.861596	0.496982	0.407084	0.583387	0.753016	0.0189053	0.887068	0.844255	0.698928	0.290912	0.873317	0.445355	0.16866	0.275007	0.288775	0.0402321	0.672394	0.40889	0.844431	0.176245	0.205721	0.265875	0.648211	0.125046	0.917743	0.923893	0.257904	0.0927191	0.947444	0.803963	0.76338	0.763253
		Penn State as discovery	0.084981	0.134249	0.136783	0.231886	0.0246807	0.854374	0.15197	0.534268	0.571095	0.022779	0.497883	0.847487	0.671764	0.226595	0.137098	0.254193	0.205046	0.555619	0.707443	0.600032	0.0634456	0.474866	0.865698	0.900876	0.447777	0.458749	0.687216	0.0560457	0.476739	0.0848255	0.0095292	0.0686697	0.600806	0.792263	0.221976	0.449914	0.582581	0.412641	0.734173	0.713881	0.981342	0.545732	0.242146	0.707095	0.303263	0.763678	0.867386
		ALSPAC as discovery	0.163428	0.466918	0.350814	0.926952	0.0187388	0.41783	0.595993	0.845684	0.639233	0.0640766	0.880143	0.961813	0.861631	0.866314	0.678007	0.189252	0.175642	0.88916	0.508066	0.500541	0.0761453	0.289359	0.692145	0.951239	0.435291	0.854002	0.655966	0.309013	0.929142	0.98565	0.351616	0.609882	0.710799	0.862672	0.054002	0.284212	0.766812	0.721271	0.166809	0.399571	0.962156	0.297736	0.885164	0.396008	0.356997	0.43573	0.788046
19	rs2637125	Pitt as discovery	0.66627	0.0692399	0.969772	0.201752	0.00254317	0.69842	0.460387	0.311353	0.192037	0.015731	0.350954	0.738846	0.21615	0.471246	0.328103	0.292878	0.0973574	0.444824	0.290246	0.0382378	0.138134	0.161172	0.650175	0.633999	0.616756	0.485425	0.209494	0.942506	0.808784	0.0944497	0.17301	0.326545	0.366846	0.0745713	0.447255	0.946015	0.287118	0.112574	0.205017	0.428621	0.0165862	0.339217	0.129772	0.397566	0.490249	0.553909	0.514864
		Penn State as discovery	0.46477	0.276852	0.836719	0.151678	0.074811	0.524175	0.0487378	0.171505	0.0407108	0.139072	0.82061	0.372399	0.668285	0.12587	0.291525	0.496596	0.547583	0.473935	0.206128	0.131568	0.14438	0.71541	0.881889	0.593049	0.342706	0.819636	0.507719	0.367357	0.684164	0.105356	0.266147	0.471399	0.523735	0.514929	0.330917	0.52824	0.261143	0.0438352	0.54686	0.309039	0.0896504	0.494457	0.105537	0.950962	0.827701	0.506379	0.53905
		ALSPAC as discovery	0.429992	0.635698	0.438313	0.586812	0.68674	0.534559	0.350747	0.255763	0.169423	0.591524	0.192247	0.867163	0.195269	0.504706	0.459504	0.542948	0.633414	0.681423	0.221196	0.0606627	0.11121	0.171931	0.754498	0.765124	0.969287	0.648633	0.443811	0.946544	0.523971	0.141282	0.231476	0.555515	0.713169	0.555607	0.772808	0.663375	0.785439	0.277668	0.60876	0.280173	0.152858	0.895751	0.0363676	0.225623	0.682711	0.542786	0.726178
20	rs4815670	Pitt as discovery	0.172718	0.680558	0.135832	0.648651	0.166659	0.241249	0.0407665	0.701791	0.538852	0.198447	0.0536241	0.787931	0.198615	0.260751	0.0810028	0.360861	0.628631	0.309794	0.591346	0.912765	0.12482	0.321065	0.279473	0.645835	0.643954	0.613468	0.968676	0.218693	0.371993	0.385509	0.146365	0.404415	0.770731	0.643168	0.764725	0.546421	0.18455	0.679379	0.517555	0.440922	0.961449	0.330331	0.0987418	0.294562	0.998981	0.637399	0.877692
		Penn State as discovery	0.617499	0.812988	0.627261	0.826804	0.791013	0.196434	0.0261248	0.430786	0.400359	0.919477	0.379792	0.869924	0.368172	0.677426	0.032893	0.458143	0.509545	0.430704	0.392944	0.984791	0.640452	0.512996	0.539793	0.586494	0.923108	0.425387	0.220903	0.275635	0.386888	0.39472	0.112475	0.216133	0.637277	0.911866	0.528934	0.794571	0.127977	0.450123	0.566076	0.506379	0.982322	0.844008	0.679432	0.328883	0.946492	0.767908	0.880655
		ALSPAC as discovery	0.952171	0.113297	0.989927	0.689537	0.389304	0.369542	0.271393	0.917006	0.700586	0.552734	0.491437	0.738613	0.52034	0.773357	0.129985	0.584789	0.731711	0.965893	0.836712	0.824229	0.239829	0.977337	0.350511	0.402455	0.877141	0.412969	0.626246	0.89858	0.47365	0.0912705	0.551983	0.294469	0.655757	0.689149	0.863438	0.120337	0.516942	0.25616	0.836468	0.730636	0.858661	0.180327	0.283289	0.772235	0.842788	0.854454	0.457327
23	rs1573036	Pitt as discovery	0.031415	0.439038	0.0702425	0.0473036	0.631936	0.0219664	0.239969	0.622821	0.367002	0.511652	0.373735	0.0531355	0.0438622	0.702405	0.299731	0.550966	0.138992	0.255052	0.987071	0.897183	0.394791	0.0572609	0.555209	0.515629	0.0920541	0.0729347	0.0292636	0.921595	0.738969	0.601504	0.496023	0.425157	0.160579	0.293121	0.184747	0.821845	0.372973	0.546276	0.672757	0.276572	0.47143	0.0103144	0.395475	0.0110171	0.00435464	0.69147	0.44636
		Penn State as discovery	0.130692	0.450088	0.22566	0.0411111	0.256696	0.232986	0.538652	0.041209	0.518727	0.372877	0.0277652	0.225299	0.806247	0.145672	0.813648	0.110017	0.00408948	0.0818483	0.125276	0.29739	0.356587	0.0201997	0.0138115	0.844242	0.171215	0.747358	0.0478747	0.480781	0.405751	0.570128	0.237152	0.110157	0.179487	0.236676	0.024603	0.0469903	0.572659	0.204934	0.560307	0.244241	0.615755	0.0597076	0.666364	0.00648157	0.000430165	0.127813	0.00344191
		ALSPAC as discovery	0.938506	0.889195	0.70005	0.467512	0.786641	0.547311	0.779124	0.811581	0.597793	0.984074	0.211838	0.612722	0.206924	0.44857	0.967595	0.829333	0.0225102	0.0967664	0.422163	0.471012	0.705062	0.0165875	0.306046	0.168634	0.22086	0.185329	0.13427	0.775945	0.89085	0.961671	0.57036	0.951296	0.861813	0.499469	0.0480259	0.218524	0.993973	0.246709	0.423165	0.168079	0.404799	0.231667	0.360407	0.103851	0.00134299	0.790841	0.242469
[truncated: 16 more columns]

## Sheet: S3 results indices
			All					Female					Male					Post-pubertal
SNP	CHR	BP	Total FWH	Upper FWH1	Upper FWH2	Lower FWH	Upper:Lower FW
rs909814	1	22573942	0.003395	0.001559	0.003011	0.01271	0.08478	0.0432	0.01791	0.01801	0.0524	0.3059	0.03171	0.03801	0.06733	0.1138	0.1439	0.002739	0.0005309	0.0006097	0.01678	0.1239
rs12059860	1	47284923	0.4762	0.4655	0.7655	0.3004	0.1954	0.4915	0.3686	0.5581	0.3595	0.4834	0.9092	0.9261	0.663	0.6896	0.2475	0.7839	0.7817	0.8858	0.4198	0.1527
rs17496332	1	107546375	0.2014	0.4094	0.3613	0.2559	0.8262	0.08793	0.1911	0.1112	0.2214	0.3603	0.9912	0.862	0.7116	0.7995	0.4695	0.5316	0.8339	0.6753	0.6689	0.5479
rs424950	1	163956503	0.5796	0.9818	0.7175	0.3191	0.4078	0.8773	0.3758	0.4136	0.69	0.8656	0.3869	0.4055	0.1974	0.3037	0.2853	0.5604	0.6683	0.4483	0.3392	0.449
rs10495024	1	216632948	0.6508	0.6558	0.9263	0.3328	0.1055	0.7042	0.8611	0.994	0.4166	0.2016	0.7334	0.6554	0.9467	0.557	0.308	0.608	0.6882	0.7326	0.2599	0.1703
rs780093	2	27742603	0.7239	0.8208	0.4866	0.2081	0.04887	0.5123	0.8647	0.4583	0.162	0.08874	0.7718	0.8188	0.7577	0.822	0.29	0.2401	0.6917	0.9846	0.07987	0.1732
rs10454142	2	48646399	0.8767	0.6853	0.442	0.6379	0.2763	0.5556	0.4981	0.4679	0.3624	0.4275	0.3127	0.8315	0.7736	0.04354	0.4602	0.4798	0.7455	0.9796	0.4099	0.7267
rs6738028	2	111949327	0.3909	0.3498	0.1091	0.8581	0.8216	0.3778	0.2074	0.08202	0.5848	0.7954	0.5636	0.7663	0.4346	0.5432	0.9347	0.1508	0.1498	0.03246	0.7311	0.7892
rs3849491	3	76484183	0.1582	0.1977	0.3429	0.1338	0.1571	0.3945	0.5399	0.9737	0.06231	0.9734	0.2232	0.2199	0.1544	0.9564	0.02668	0.1482	0.1934	0.3856	0.1049	0.1273
rs293428	4	69591782	0.4778	0.3976	0.4686	0.6608	0.9161	0.768	0.8503	0.8257	0.7634	0.9034	0.4617	0.2936	0.1766	0.7455	0.7686	0.4626	0.6944	0.7972	0.4146	0.2611
rs11132733	4	190641170	0.287	0.2665	0.318	0.2887	0.5409	0.8293	0.8257	0.7219	0.6615	0.7564	0.1441	0.1155	0.2254	0.2368	0.5707	0.2003	0.2829	0.4055	0.3231	0.543
rs10514317	5	89109750	0.6723	0.1341	0.3022	0.8993	0.3416	0.8468	0.5866	0.6915	0.7871	0.1711	0.3902	0.1064	0.2799	0.5779	0.8986	0.3375	0.05792	0.1809	0.7007	0.7188
rs3779195	7	97993362	0.4072	0.3676	0.5267	0.4952	0.4434	0.4108	0.2448	0.3957	0.9151	0.3807	0.7264	0.9347	0.976	0.3351	0.8669	0.8118	0.3949	0.4755	0.9369	0.09982
rs740160	7	98957880	0.8145	0.8409	0.6251	0.5957	0.9623	0.6771	0.8986	0.7936	0.5927	0.9815	0.8473	0.8027	0.6984	0.8617	0.9163	0.61	0.83	0.5899	0.9837	0.7396
rs148982377	7	99075038	0.8658	0.7268	0.6359	0.237	0.2335	0.4985	0.8481	0.7896	0.1581	0.3987	0.7003	0.878	0.8086	0.8512	0.0067	0.762	0.8156	0.7452	0.2922	0.72
rs11761528	7	99118801	0.9158	0.9544	0.542	0.2656	0.5514	0.8706	0.9446	0.792	0.174	0.3376	0.8067	0.9901	0.6369	0.942	0.03412	0.789	0.9841	0.5503	0.5134	0.8646
rs17277546	7	99489571	0.9854	0.5942	0.3626	0.8393	0.8791	0.226	0.08972	0.09963	0.2636	0.8859	0.1205	0.1917	0.4943	0.06072	0.9686	0.7991	0.5371	0.3344	0.6231	0.9102
rs440837	8	81461974	0.4091	0.4191	0.7776	0.9704	0.8142	0.9614	0.6588	0.3674	0.9209	0.1608	0.2261	0.08261	0.1457	0.8662	0.04533	0.3657	0.4375	0.6753	0.8301	0.9255
rs10795130	10	4151121	0.1134	0.4656	0.4887	0.2393	0.3754	0.833	0.9281	0.8888	0.9507	0.6287	0.02367	0.2128	0.3456	0.03866	0.05949	0.3957	0.8008	0.7227	0.7441	0.1708
rs7910927	10	65138910	0.04226	0.05765	0.09843	0.5525	0.899	0.2927	0.1863	0.1446	0.6109	0.7056	0.08544	0.2428	0.5169	0.1337	0.8302	0.0527	0.0367	0.05428	0.8323	0.8241
rs10822184	10	65337153	0.08252	0.1269	0.2243	0.6745	0.964	0.4925	0.283	0.2477	0.3686	0.4436	0.06785	0.3124	0.6539	0.06694	0.4183	0.1349	0.1143	0.157	0.9639	0.999
rs10822186	10	65350383	0.09555	0.1253	0.2206	0.7735	0.9667	0.4824	0.2554	0.2254	0.3527	0.462	0.09038	0.3494	0.6991	0.09846	0.4357	0.1491	0.112	0.1501	0.881	0.9676
rs2497306	10	94485211	0.9925	0.5922	0.5035	0.9905	0.09404	0.7367	0.5055	0.3299	0.7047	0.3479	0.6861	0.9723	0.8627	0.6349	0.1405	0.993	0.8489	0.6077	0.7014	0.3688
rs2185570	10	96751270	0.1563	0.2482	0.3975	0.1884	0.1567	0.205	0.2089	0.2059	0.5217	0.5308	0.5006	0.7457	0.88	0.2164	0.1545	0.4084	0.5111	0.6066	0.4898	0.3078
rs4149056	12	21331549	0.2526	0.2857	0.2153	0.2859	0.7525	0.7684	0.8959	0.9623	0.5191	0.878	0.2415	0.2155	0.126	0.4283	0.7434	0.355	0.4221	0.3186	0.4475	0.5777
rs7181230	15	40360741	0.3601	0.6186	0.9918	0.4613	0.2485	0.1888	0.4936	0.7408	0.09607	0.4647	0.8149	0.9102	0.6382	0.3158	0.3512	0.4332	0.6665	0.9741	0.7077	0.2061
rs8023580	15	96708291	0.2787	0.5151	0.849	0.5112	0.02237	0.1602	0.03781	0.03847	0.3129	0.308	0.0009605	0.0007347	0.008407	0.0161	0.02033	0.9725	0.6449	0.5141	0.7369	0.2401
rs12596210	16	54027971	0.1125	0.2415	0.2979	0.2483	0.7352	0.364	0.291	0.2902	0.8386	0.8741	0.1466	0.505	0.6507	0.1123	0.7567	0.1925	0.2335	0.2831	0.4321	0.9895
rs2075230	17	7487108	0.07306	0.3617	0.3587	0.284	0.3246	0.3667	0.4731	0.5133	0.9144	0.1923	0.1153	0.6305	0.6077	0.1198	0.9708	0.3586	0.592	0.5157	0.8059	0.2416
rs12150660	17	7521915	0.7527	0.5161	0.5587	0.1386	0.1518	0.726	0.3265	0.4143	0.4295	0.2131	0.3865	0.856	0.9635	0.1688	0.4673	0.7249	0.6652	0.9719	0.3525	0.1892
rs1799941	17	7533423	0.7764	0.5521	0.6109	0.1252	0.08381	0.5515	0.315	0.4183	0.5848	0.2259	0.2791	0.811	0.9107	0.07605	0.218	0.6578	0.7888	0.8398	0.2979	0.1196
rs6259	17	7536527	0.4257	0.1664	0.07106	0.7677	0.4721	0.3046	0.1319	0.0746	0.8948	0.2121	0.9317	0.819	0.5548	0.5638	0.7335	0.8656	0.4288	0.2309	0.7704	0.1073
rs727428	17	7537792	0.635	0.4073	0.3076	0.2571	0.07466	0.4909	0.4311	0.4074	0.7972	0.05668	0.1213	0.7299	0.5281	0.02647	0.6171	0.8239	0.8083	0.8281	0.8176	0.03197
rs72829446	17	7552123	0.7727	0.3607	0.2532	0.7536	0.9305	0.6777	0.4172	0.3016	0.9671	0.5265	0.8557	0.7861	0.694	0.6309	0.3893	0.9146	0.5807	0.4317	0.9012	0.4307
rs1641549	17	7574775	0.09887	0.2549	0.3139	0.2034	0.00644	0.2404	0.2768	0.2001	0.7419	0.1067	0.2311	0.6368	0.9662	0.0931	0.02281	0.2431	0.1425	0.08817	0.8521	0.07273
rs9905820	17	12637371	0.696	0.977	0.7389	0.8459	0.3919	0.2528	0.2808	0.527	0.8997	0.6695	0.4967	0.2641	0.2443	0.9421	0.4093	0.4529	0.3518	0.4526	0.6964	0.2587
rs2411984	17	47445751	0.391	0.7327	0.4348	0.5811	0.4231	0.8793	0.9406	0.7333	0.866	0.8917	0.2011	0.6218	0.3645	0.2196	0.1522	0.6904	0.8319	0.4987	0.9472	0.7466
rs8077059	17	55823552	0.4094	0.1659	0.1333	0.8597	0.2455	0.8754	0.6295	0.3895	0.3775	0.2014	0.1766	0.1427	0.2416	0.4115	0.7528	0.282	0.03426	0.01968	0.9144	0.246
rs2637125	19	48401893	0.84	0.3742	0.4649	0.1765	0.5282	0.9009	0.2453	0.1873	0.2829	0.7604	0.7228	0.8742	0.7703	0.4514	0.5399	0.9149	0.5892	0.4185	0.4884	0.9132
rs4815670	20	4216864	0.1607	0.1361	0.1026	0.2417	0.9967	0.5296	0.5145	0.3982	0.514	0.812	0.1548	0.133	0.1302	0.2712	0.7768	0.143	0.1074	0.09685	0.1693	0.6754
rs5934505	23	8913826	0.3741	0.7699	0.4815	0.5117	0.2336	0.6396	0.9825	0.8754	0.9648	0.07329	0.4761	0.7676	0.4815	0.4039	0.9458	0.7905	0.9701	0.589	0.9819	0.7914
rs1573036	23	109820068	0.6826	0.9858	0.9215	0.449	0.03226	0.5553	0.8572	0.8359	0.5251	0.003082	0.9779	0.8535	0.7414	0.6473	0.722	0.3343	0.3068	0.4003	0.4383	0.06104
